# Supplementary material
Source: PubMed Central journal article supplement (PMC2262972)

## E07-06-0600 Ferreira

### **Figure S1 : Quantification of Fur4p-GFP amounts under aerobic-like and lipid-depleted conditions.**

*hem1*Δ [pF138gF-GFP] cells were grown to late exponential phase in YPRaff + ALA and shifted to fresh YPRaff (lipid-depleted) or YPRaff + ALA (aerobic-like). Fur4p-GFP synthesis was induced by adding galactose (4 % final) to the medium after 7 h following shift. (A) Total proteins were extracted from cells at the time indicated following Fur4p-GFP induction and the same amounts of total protein were subjected to SDS-PAGE and Western blot analysis using an anti-Pma1p antibody or an anti-GFP antibody for Fur4p-GFP detection. (B) The intensities of the bands corresponding to Fur4p-GFP under the conditions and times indicated have been quantified using the Scion image software. A. U.: Arbitrary Units.

# Figure S1

**A**

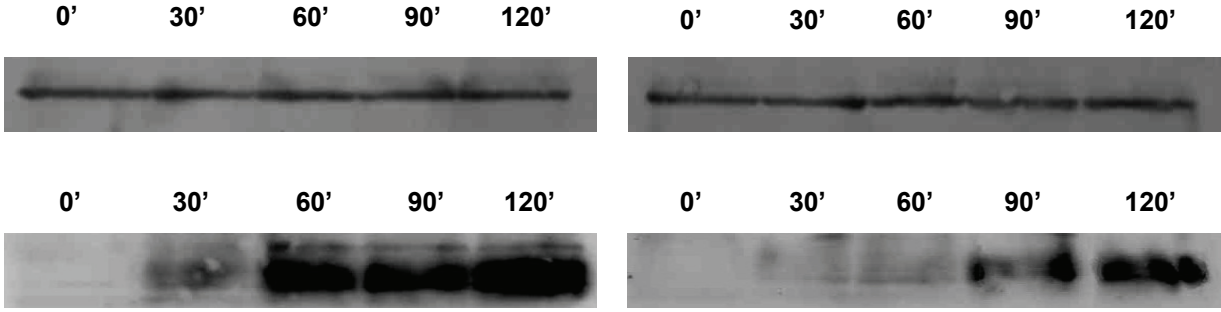

**B**

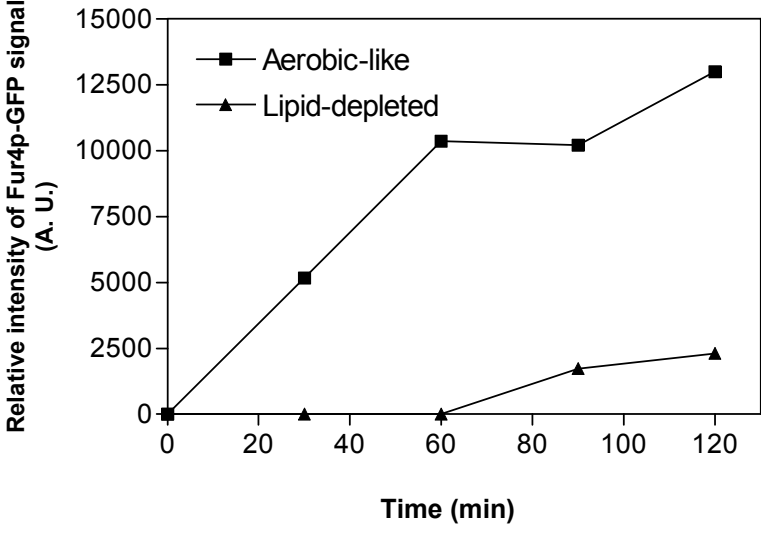

Supplement: mbc_E07-06-0600_1.pdf [file mbc_E07-06-0600_1.pdf]
